# Supplementary material for: A Complex Radiomic Signature in Luminal Breast Cancer from a Weighted Statistical Framework: A Pilot Study
Source: MDPI journal article supplement (doi:10.3390/diagnostics12020499), 2022-02-15
Supplement: s1 [file s1]

## Supplementary Materials

**Table S1:** Description of Radiomic Features.

| Feature Classes | Imaging Techniques                          | Counts | Notes                                                                                                                             |
|-----------------|---------------------------------------------|--------|-----------------------------------------------------------------------------------------------------------------------------------|
| First Order     | ADC-MRI without contrast agent              | 5      | Exhibits voxel alone based statistical features.                                                                                  |
|                 | T2w-MRI (T2)                                | 5      |                                                                                                                                   |
|                 | T1w-MRI post-contrast agent injection (T1C) | 5      |                                                                                                                                   |
|                 | PET                                         | 5      |                                                                                                                                   |
| Second Order    | T2w-MRI (T2)                                | 19     | Describes surface texture.                                                                                                        |
|                 | T1w-MRI post-contrast agent injection (T1C) | 19     |                                                                                                                                   |
| SUV             | PET                                         | 16     | The standard uptake value (SUV), also known as standardized uptake value, is a simple way of determining activity in PET imaging. |
| Total           |                                             | 74     |                                                                                                                                   |

**Table S2:** Modelling Performance to Detect Tumor Subtypes (Luminal A and B)

| <b>Modelling performance with PC6 (non-normalized)</b> |                    |                    |                 |                                |            |
|--------------------------------------------------------|--------------------|--------------------|-----------------|--------------------------------|------------|
|                                                        | <b>Sensitivity</b> | <b>Specificity</b> | <b>Accuracy</b> | <b>Sensitivity+Specificity</b> | <b>AUC</b> |
| <b>LDA</b>                                             | 67%                | 49%                | 58%             | 1.16                           | 59%        |
| <b>RF</b>                                              | 89%                | 16%                | 52%             | 1.05                           | 69%        |
| <b>LogistBoost</b>                                     | 83%                | 24%                | 54%             | 1.07                           | 54%        |
| <b>Modelling performance with PC6 (z-score)</b>        |                    |                    |                 |                                |            |
|                                                        | <b>Sensitivity</b> | <b>Specificity</b> | <b>Accuracy</b> | <b>Sensitivity+Specificity</b> | <b>AUC</b> |
| <b>LDA</b>                                             | 67%                | 42%                | 55%             | 1.09                           | 60%        |
| <b>RF</b>                                              | 89%                | 17%                | 53%             | 1.06                           | 75%        |
| <b>LogistBoost</b>                                     | 90%                | 14%                | 52%             | 1.04                           | 52%        |
| <b>Modelling performance with PC3 (Quartile)</b>       |                    |                    |                 |                                |            |
|                                                        | <b>Sensitivity</b> | <b>Specificity</b> | <b>Accuracy</b> | <b>Sensitivity+Specificity</b> | <b>AUC</b> |
| <b>LDA</b>                                             | 80%                | 53%                | 66%             | 1.33                           | 73%        |
| <b>RF</b>                                              | 88%                | 24%                | 56%             | 1.12                           | 75%        |
| <b>LogistBoost</b>                                     | 79%                | 36%                | 57%             | 1.15                           | 57%        |
| <b>Modelling performance with PC4 (Quartile)</b>       |                    |                    |                 |                                |            |
|                                                        | <b>Sensitivity</b> | <b>Specificity</b> | <b>Accuracy</b> | <b>Sensitivity+Specificity</b> | <b>AUC</b> |
| <b>LDA</b>                                             | 78%                | 45%                | 62%             | 1.23                           | 63%        |
| <b>RF</b>                                              | 91%                | 26%                | 58%             | 1.17                           | 76%        |
| <b>LogistBoost</b>                                     | 83%                | 30%                | 56%             | 1.13                           | 56%        |

AUC: Area Under the Curve; LDA: Linear Discriminant Analysis; RF: Random Forest.

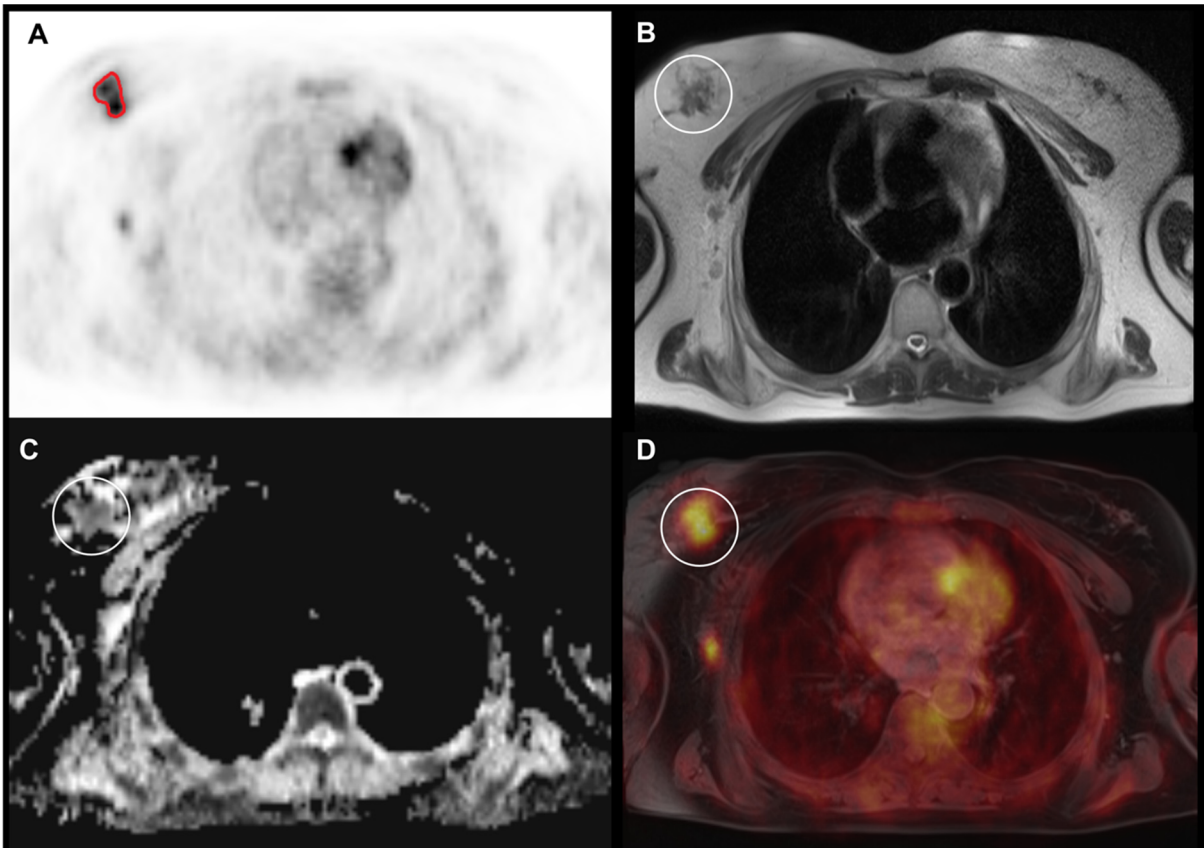

**Supplementary Figure S1.**  $^{18}\text{F}$ -FDG-PET/MRI scan Images of a 63-year-old patient with a breast heteroplastic process on the right breast. The white circle indicates the lesion: (A) PET image showing uptake after 60 minutes of a segmented lesion (red depicted); (B) Lesion revealed on T2 weighted image (T2WI) acquired on the axial plane; (C) hypointensity of the lesion on apparent diffusion coefficient (ADC) map; (D)  $^{18}\text{F}$ -FDG-PET/MRI fusion image.

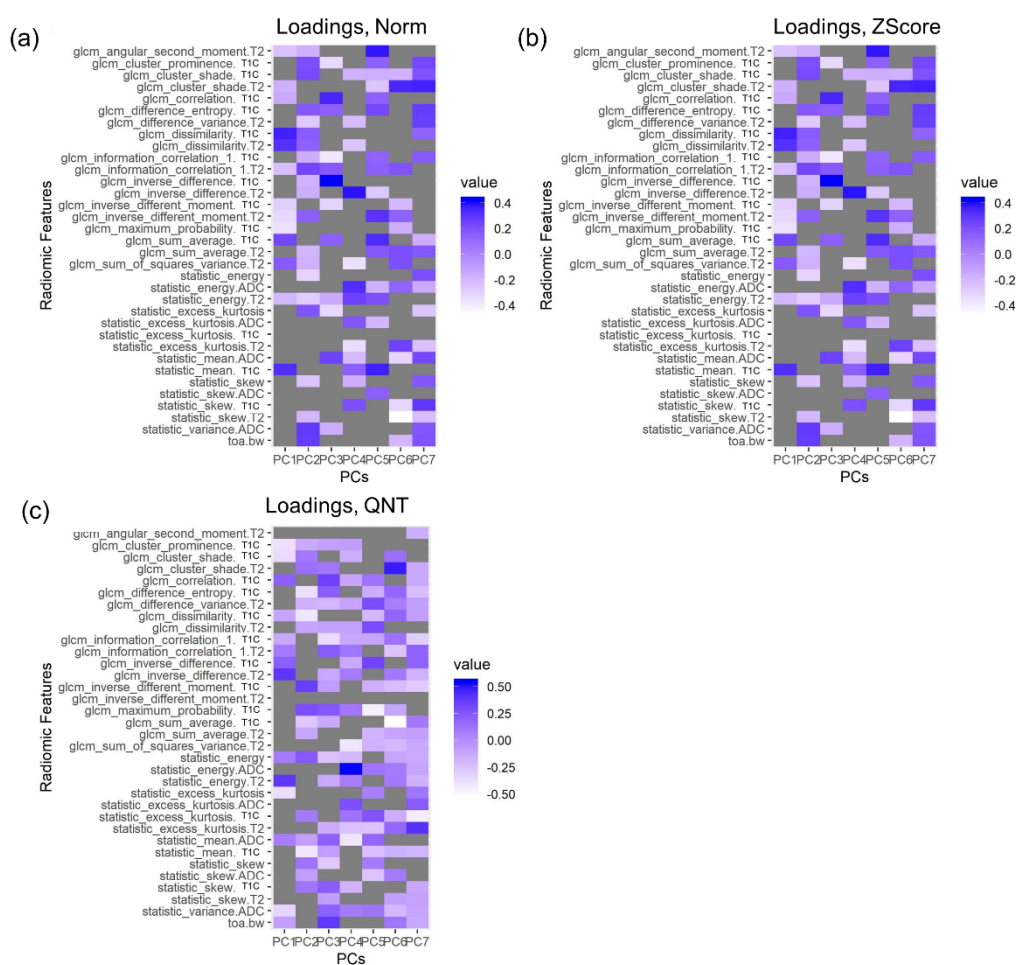

**Supplementary Figure S2.** Loadings Plots for 3 datasets. Highlighted boxes are above the 3<sup>rd</sup> quantile threshold. (a) Normalize only as ratio of malignant and healthy radiomic features; (b) Z-Score; (c) Quantile.

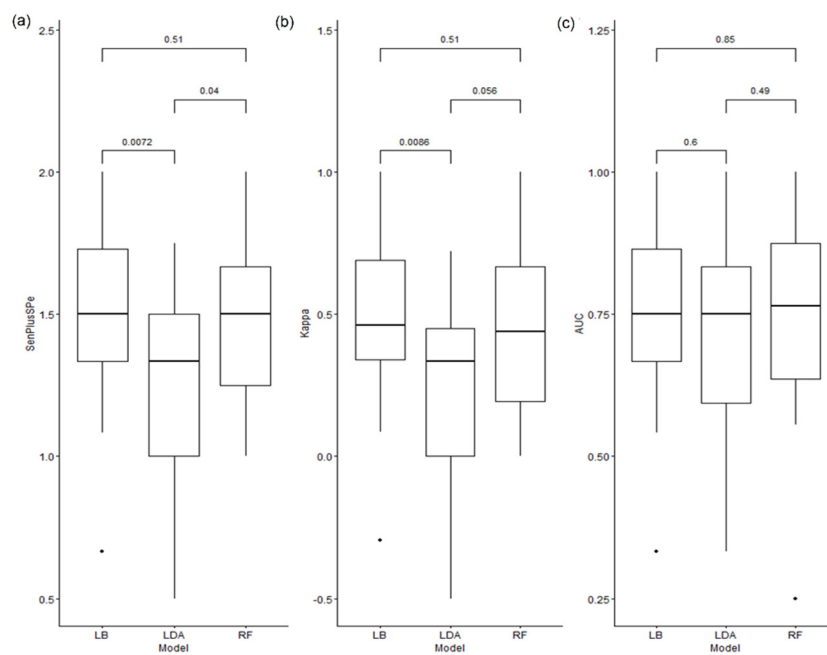

**Supplementary Figure S3.** Comparison among models (LB: LogistBoost, LDA: Linear decision Analysis, RF: Random Forest) used to classify tumor grade. (a) Boxplot of Sensitivity+Specificity value. (b) Boxplot of Cohen's Kappa. (c) Boxplot of AUC values.

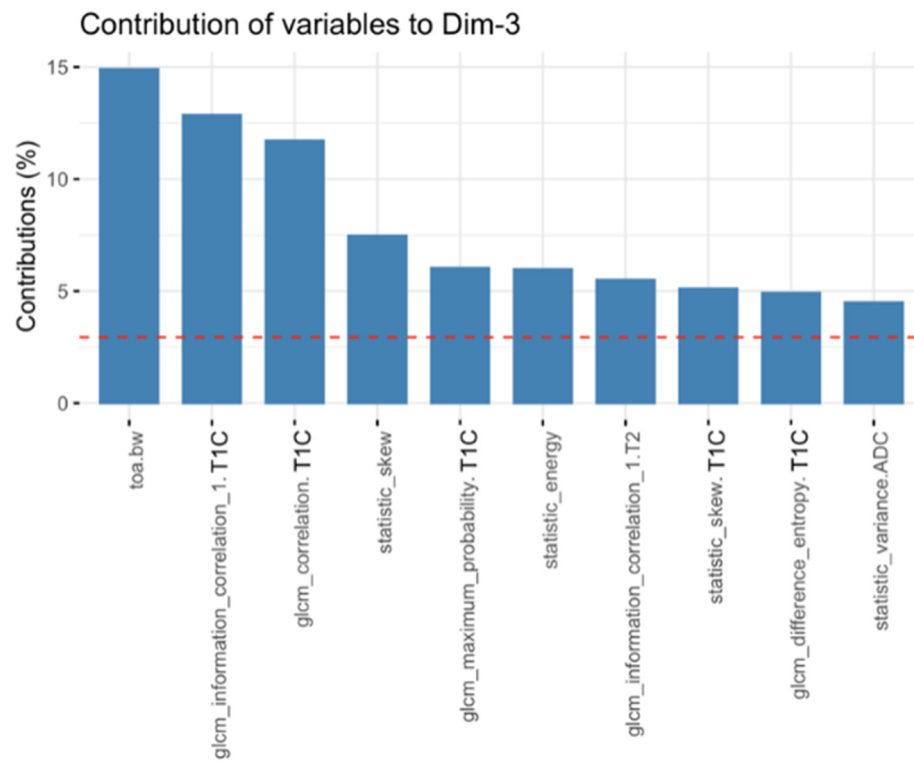

Supplementary Figure S4. PC3 Quantile. Top 10 variable contribution.

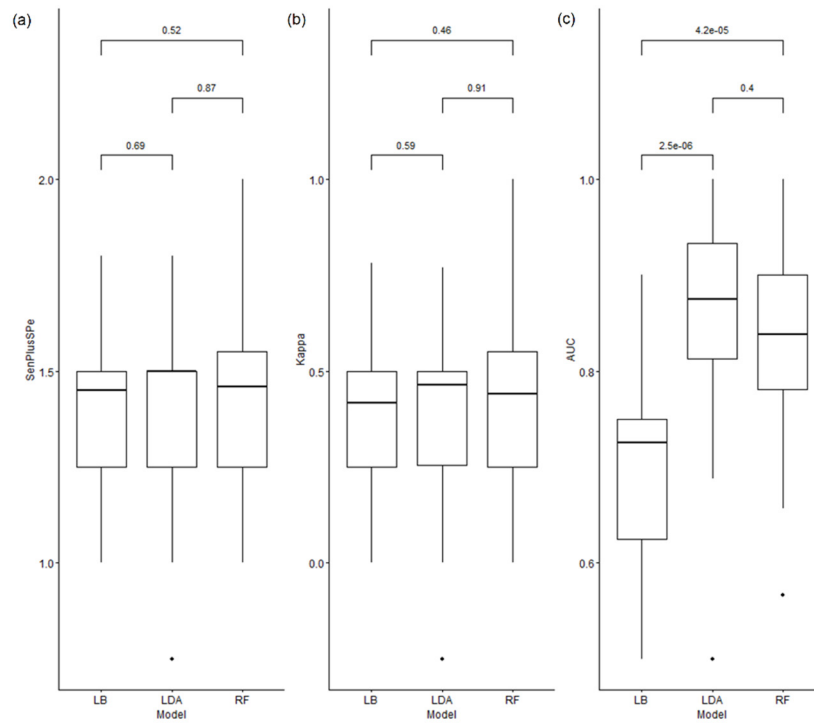

**Supplementary Figure S5.** Comparison among models (LB: LogistBoost, LDA: Linear decision Analysis, RF: Random Forest) used to classify high and low value of KI\_67. (a) Boxplot of Sensitivity+Specificity value. (b) Boxplot of Cohen's Kappa. (c) Boxplot of AUC values.

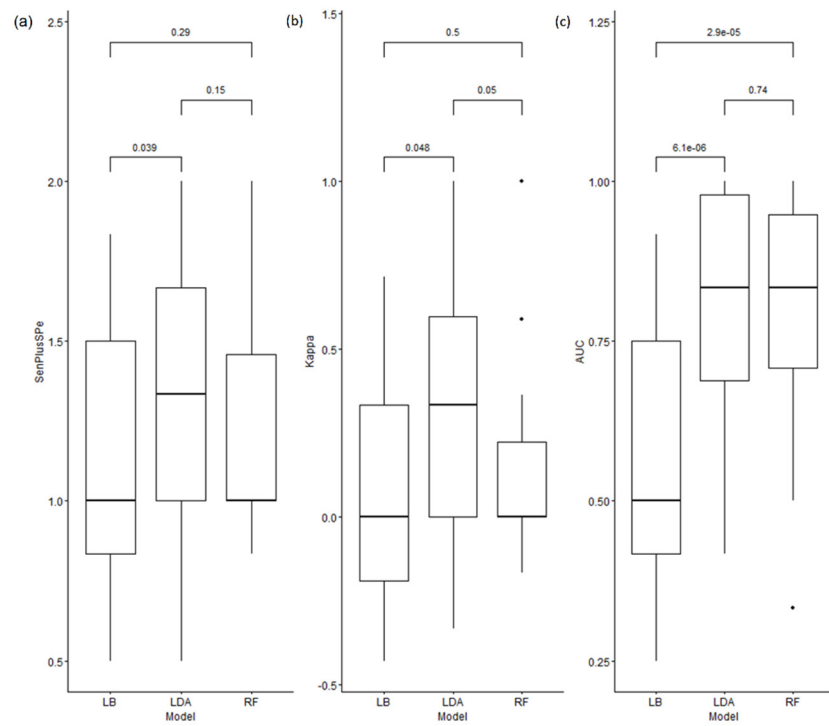

**Supplementary Figure S6.** Comparison among models (LB: LogistBoost, LDA: Linear decision Analysis, RF: Random Forest) used to classify tumor subtype. (a) Boxplot of Sensitivity+Specificity value. (b) Boxplot of Cohen's Kappa. (c) Boxplot of AUC values.
